# Supplementary material for: NSrp70 suppresses metastasis intriple-negative breast cancer by modulating Numb/TβR1/EMT axis
Source: Research Square preprint supplement (doi:10.21203/rs.3.rs-311222/v1), 2021-03-18
Supplement: Supplementary file 1 [file e5bb474b21079431d3558ac2.docx]

**Additional Files**

**Immunohistochemical (IHC) staining**

Immunohistochemistry for NSrp70 were conducted using a two-step protocol (GTVisionTMIII). Briefly, TMA sections were washed with phosphate-buffered saline (PBS) after rehydration and then treated with 3% hydrogen peroxide for 10 min to block endogenous peroxidase activity. The antigens were retrieved by boiling the TMAs in citrate buffer (pH 6.0) at 100oC for 10 min. The TMAs were blocked with 10% normal goat serum for 1 h at room temperature (RT) and incubated in a humid chamber at 4oC overnight with indicated antibody. Following washes with PBS, all of the TMAs were incubated for 30 min with secondary antibody (GTVisionTMIII Detection System/Mo&Rb) at RT. The sections were counterstained with Gill hematoxylin and mounted after clearing with xylene.

**IHC variable semiquantitative evaluation**

TMAs representing duplicate samples from each case were stained and scored semi-quantitatively. Staining was graded based on the staining intensity (1, weak; 2, moderate; 3, strong) and the percentage of cells stained (1, 0 to <10%; 2, 10 to <50%; 3, 50 to 100%). Scoring was conducted according to a sum index (SI) of the intensity and percentage of positive cells as follows: SI, 2, scored as 0; SI, 3, scored as 1; SI, 4, scored as 2; SI, 5 or 6, scored as 3. If the score was equal to or greater than two, the tumor was considered to have high expression; otherwise, low expression was classified. Scoring was reviewed in parallel by two experienced breast disease pathologists who were blinded to all clinical data.

**Truncations of NSrp70 and NUMB Minigene**

Two truncations of NSrp70 M15 and RS1M were synthesized by Genewiz. The detailed sequence were followes:

NSrp70-M15

ATGGCGATTCCGGGCAGGCAGTATGGGCTTATTTTGCCAAAGAAAACACAGCAGTTGCACCCTGTTTTGCAAAAACCATCAGTGTTTGGGAATGATTCTGATGATGATGATGAGACCTCTGTGAGTGAAAGCCTTCAGAGGGAAGCTGCTAAGAAGCAGGCCATGAAACAGACCAAACTGGAAATCCAGAAGGCCCTTGCAGAAGATGCTACTGTGTATGAATATGACAGTATTTATGATGAAATGCAGAAAAAAAAGGAGGAAAATAATCCCAAATTGCTTTTGGGGAAAGACAGAAAGCCCAAGTATATTCACAACTTGCTAAAAGCAGTTGAGATCAGAAAAAAGGAACAGGAAAAAAGAATGGAAAAGAAAATACAGAGAGAACGAGAAATGGAAAAGGGGGAGTTTGATGATAAAGAAGCATTTGTGACATCTGCATATAAGAAAAAACTGCAAGAGAGAGCTGAAGAAGAAGAAAGAGAAAAGAGGGCTGCTGCACTGGAAGCATGTTTGGATGTAACCAAGCAGAAAGATCTCAGTGGATTTTATAGGCACCTATTAAATCAAGCAGTTGGTGAAGAGGAAGTACCTAAATGCAGCTTTCGTGAAGCCAGATCTGGTATAAAGGAAGAAAAATCAAGGGGCTTCTCCAATGAAGTAAGTTCAAAAAACAGAATACCACAAGAGAAATGCATTCTTCAAACTGATGTGAAAGTAGAGGAAAACCCAGATGCAGACAGTGACTTCGATGCTAAGAGCAGTGCGGATGATGAAATAGAAGAAACTAGAGTGAACTGCAGAAGGGAAAAGGTCATAGAGACCCCTGAGAATGACTTCAAGCACCACAGGAGTCAAAACCACTCTAACAAAATGAGAAACATGGCAAAGGACAAAGAAAGAAACCAAGAGAAACCCTCTAATTCTGAATCATCACTGGGAGCAAAACACAGACTCACAGAGGAAGGGCAAGAGAAGGGTAAAGAACAAGAGAGACCACCTGAGGCAGTGAGCAAGTTTGCAAAGCGGAACAATGAAGAAACTGTAATGTCAGCTAGAGACAGGTACTTGGCCAGGCAGATGGCGCGGGTTAATGCAAAGACCTATATTGAGAAAGAAGATGATTGA

NSrp70-RS1M

ATGGCGATTCCGGGCAGGCAGTATGGGCTTATTTTGCCAAAGAAAACACAGCAGTTGCACCCTGTTTTGCAAAAACCATCAGTGTTTGGGAATGATTCTGATGATGATGATGAGACCTCTGTGAGTGAAAGCCTTCAGAGGGAAGCTGCTAAGAAGCAGGCCATGAAACAGACCAAACTGGAAATCCAGAAGGCCCTTGCAGAAGATGCTACTGTGTATGAATATGACAGTATTTATGATGAAATGCAGAAAAAAAAGGAGGAAAATAATCCCAAATTGCTTTTGGGGAAAGACAGAAAGCCCAAGTATATTCACAACTTGCTAAAAGCAGTTGAGATCAGAAAAAAGGAACAGGAAAAAAGAATGGAAAAGAAAATACAGAGAGAACGAGAAATGGAAAAGGGGGAGTTTGATGATAAAGAAGCATTTGTGACATCTGCATATAAGAAAAAACTGCAAGAGAGAGCTGAAGAAGAAGAAAGAGAAAAGAGGGCTGCTGCACTGGAAGCATGTTTGGATGTAACCAAGCAGAAAGATCTCAGTGGATTTTATAGGCACCTATTAAATCAAGCAGTTGGTGAAGAGGAAGTACCTAAATGCAGCTTTCGTGAAGCCAGATCTGGTATAAAGGAAGAAAAATCAAGGGGCTTCTCCAATGAAGTAAGTTCAAAAAACAGAATACCACAAGAGAAATGCATTCTTCAAACTGATGTGAAAGTAGAGGAAAACCCAGATGCAGACAGTGACTTCGATGCTAAGAGCAGTGCGGATGATGAAATAGAAGAAACTAGAGTGAACTGCAGAAGGGAAAAGGTCATAGAGACCCCTGAGAATGACTTCAAGCACCACAGGAGTCAAAACCACTCTAGGGAGAAAGATAGGGAGAAATATTCCCAAAGAGAACAAGAAAGAGATAGACAACAAAATGATCAGAACCGACCCAGTGAGAAAGGAGAGAAGGAAGAGAAAAGCAAAGCAAAGGAAGAGCATATGAAAGTAAGGAAGGAAAGATATGAAAATAATGATAAATACAGAGATAGAGAAAAACGAGAGGTAGGTGTTCAGTCTTCAGAAAGAAATCAAGACAGAAAGGAAAGCAGCCCAAATTCTAGGGCAAAGGATAAATTTCTTGACCAAGAAAGATCCAACAAAATGAGAAACATGGCAAAGGACAAAGAAAGAAACCAAGAGAAACCCTCTAATTCTGAATCATCACTGGGAGCAAAACACAGACTCACAGAGGAAGGGCAAGAGAAGGGTAAAGAACAAGAGAGACCACCTGAGGCAGTGAGCAAGTTTGCAAAGCGGAACAATGAAGAAACTGTAATGTCAGCTAGAGACAGGTACTTGGCCAGGCAGATGGCGCGGGTTAATGCAAAGACCTATATTGAGAAAGAAGATGATTGA

The detailed sequence of NUMN exon12 minigene was followed:

NUMB exon 11-12-13

TGCCAGAAGTAGAAGGGGAGGCAGAGAGCATCAGCTCCCTGTGCTCACAGATCACCAATGCCTTCAGCACACCTGAGGACCCCTTCTCATCTGCTCCGATGACCAAACCAGTGACAGTGGTGGCACCACAATCTCCTACCTTCCAAGCTAATGGCACTGACTCAGCCTTCCATGTGCTTGCTAAGCCAGCCCATACTGCTCTAGCACCCGTAGCAATGCCTGTGCGTGAAACCAACCCTTGGGCCCATGCCCCTGATGCTGCTAACAAGGAAATTGCAGCCACATGTTCGGGGACCGAGTGGGGTCAATCTTCTGGTGCTGCCTCTCCAGGTCTCTTCCAGGCCGGTCATAGACGTACTCCCTCTGAGGCCGACCGATGGTTAGAAGAGGTGTCTAAGAGCGTCCGGGCTCAGCAGCCCCAGGCCTCAGCTGCTCCTCTGCAGCCAGTTCTCCAGCCTCCTCCACCCACTGCCATCTCCCAGCCAGCATCACCTTTCCAAGGGAATGCATTCCTCACCTCTCAGCCTGTGCCAGTGGGTGTGGTCCCAGCCCTGCAACCAGCCTTTGTCCCTGCCCAGTCCTATCCTGTGGCCAATGGAATGCCCTATCCAGCCCCTAATGTGCCTGTGGTGGGCATCACTCCCTCCCAGATGGTGGCCAACGTATTTGGCACTGCAGGCCACCCTCAGGCTGCCCATCCCCATCAGTCACCCAGCCTGGTCAGGCAGCAGACATTCCCTCACTACGAGGCAAGCAGTGCTACCACCAGTCCCTTCTTTAAGCCTCCTGCTCAGCACCTCAACGGTTCTGCAGCTTTCAATGGTGTAGATGATGGCAGGTTGGCCTCAGCAGACAGGCATACAGAGGTTCCTACAGGCACCTGCCCAGTGGATCCTTTTGAAGCCCAGTGGGCTGCATTAGAAAATAAGTCCAAGCAGCGTACTAATCCCTCCCCTACCAACCCTTTCTCCAGTGACTTACAGAAGACGTTTGAAATTGAACTTTAAGCAATCATTATGGCTATGTATCTTGTCCATACCAGACAGGGAGCAGGGGGTAGCGGTCAAAGGAGCAAAACAGACTTTGTCTCCTGATTAGTACTCTTTTCACTAATCCCAAAGGTCCCAAGGAACAAGTCCAGGCCCAGAGTACTGTGAGGGGTGATTTTGAAAGACATGGGAAAAAGCATTCCTAGAGAAAAGCTGCCTTGCAATTAGGCTAAAGAAGTCAAGGAAATGTTGCTTTCTGTACTCCCTCTTCCCTTACCCCCTTACAAATCTCTGGCAACAGAGAGGCAAAGTATCTGAACAAGAATCTATATTCCAAGCACATTTACTGAAATGTAAAACACAACAGGAAGCAAAGCAATCTCCCTTTGTTTTTCAGGCCATTCACCTGCCTCCTGTCAGTAGTGGCCTGTATTAGAGATCAAGAAGAGTGGTTTGTGCTCAGGCTGGGGAACAGAGAGGCACGCTATGCTGCCAGAATTCCCAGGAGGGCATATCAGCAACTGCCCAGCAGAGCTATATTTTGGGGGAGAAGTTGAGCTTCCATTTTGAGTAACAGAATAAATATTATATATATCAAAAGCCAAAATCTTTATTTTTATGCATTTAGAATATTTTAAATAGTTCTCAGATATTAAGAAGTTGTATGAGTTGTAAGTAATCTTGCCAAAGGTAAAGGGGCTAGTTGTAAGAAATTGTACATAAGATTGATTTATCATTGATGCCTACTGAAATAAAAAGAGGAAAGGCTGGAAGCTGCAGACAGGATCCCTAGCTTGTTTTCTGTCAGTCATTCATTGTAAGTAGCACATTGCAACAACAATCATGCTTATGACCAATACAGTCACTAGGTTGTAGTTTTTTTTAAATAAAGGAAAAGCAGTATTGTCCTGGTTTTAAACCTATGATGGAATTCTAATGTCATTATTTTAATGGAATCAATCGAAATATGCTCTATAGAGAATATATCTTTTATATATTGCTGCAGTTTCCTTATGTTAATCCTTTAACACTAAGGTAACATGACATAATCATACCATAGAAGGGAACACAGGTTACCATATTGGTTTGTAATATGGGTCTTGGTGGGTTTTGTTTTATCCTTTAAATTTTGTTCCCATGAGTTTTGTGGGGATGGGGATTCTGGTTTTATTAGCTTTGTGTGTGTCCTCTTCCCCCAAACCCCCTTTTGGTGAGAACATCCCCTTGACAGTTGCAGCCTCTTGACCTCGGATAACAATAAGAGAGCTCATCTCATTTTTACTTTTGAACGTTGGCCTTACAATCAAATGTAAGTTATATATATTTGTACTGATGAAAATTTATAATCTGCTTTAACAAAAATAAATGTTCATGGTAGAAGCTTTT

**Supplementary Table S1** Primers used in this study.

| Primer name | sequences |
| --- | --- |
| NSrp70-F | AGCAGTTGCACCCTGTTTTG |
| NSrp70-R | GTTTGGTCTCTTTCATGGCCT |
| MTMR2v-F | GACTGCTTCAGCCTTTCCCT |
| MTMR2v-R | GAGAAGTGGAGGCACTGGAC |
| NUMBv-F | CTCCTACCTTCCAAGGGACC |
| NUMBv-R | GAGAACTGGCTGCAGAGGAG |
| CD44v-F | GAATCCCTGCTACCAATAGGAATG |
| CD44v-R | TGGGGTGGAATGTGTCTTGG |
| GAPDH-F | GGTGGTCTCCTCTGACTTCAACA |
| GAPDH-R | GTTGCTGTAGCCAAATTCGTTGT |

**Supplementary Table S2** Antibodies used in this study.

| Primary antibody | company | source | dilution |
| --- | --- | --- | --- |
| CD44 | Proteintech | Rabbit | 1:1000 |
| MTMR2 | Proteintech | Rabbit | 1:1000 |
| NSrp70 | ATLAS | Rabbit | 1:1000 |
| SRSF1（ASF/SF2） | Proteintech | Rabbit | 1:1000 |
| NSrp70（CCDC55） | Proteintech | Rabbit | 1:1000 |
| NUMB | Abcam | Rabbit | 1:1000 |
| NSrp70 | Abcam | Rabbit | 1:1000 |
| p-Smad3 | Abcam | Rabbit | 1:1000 |
| Febronectin | Proteintech | Mouse | 1:1000 |
| N-cadherin | BD | Mouse | 1:1000 |
| Vimentin | SAB | Mouse | 1:1000 |
| E-cadherin | CST | Rabbit | 1:1000 |
| TGF-βR1 | Abcam | Rabbit | 1:1000 |
| TGF-βR2 | Proteintech | Mouse | 1:1000 |
| UBQUITIN | Proteintech | Rabbit | 1:1000 |
| GAPDH | HRP-conjµgated Mouse | Proteintech | 1:20000 |

**Supplementary figures and legends**

**Supplementary Figure S1 NSrp70 expression is down-regulated in highly metastatic breast cancer
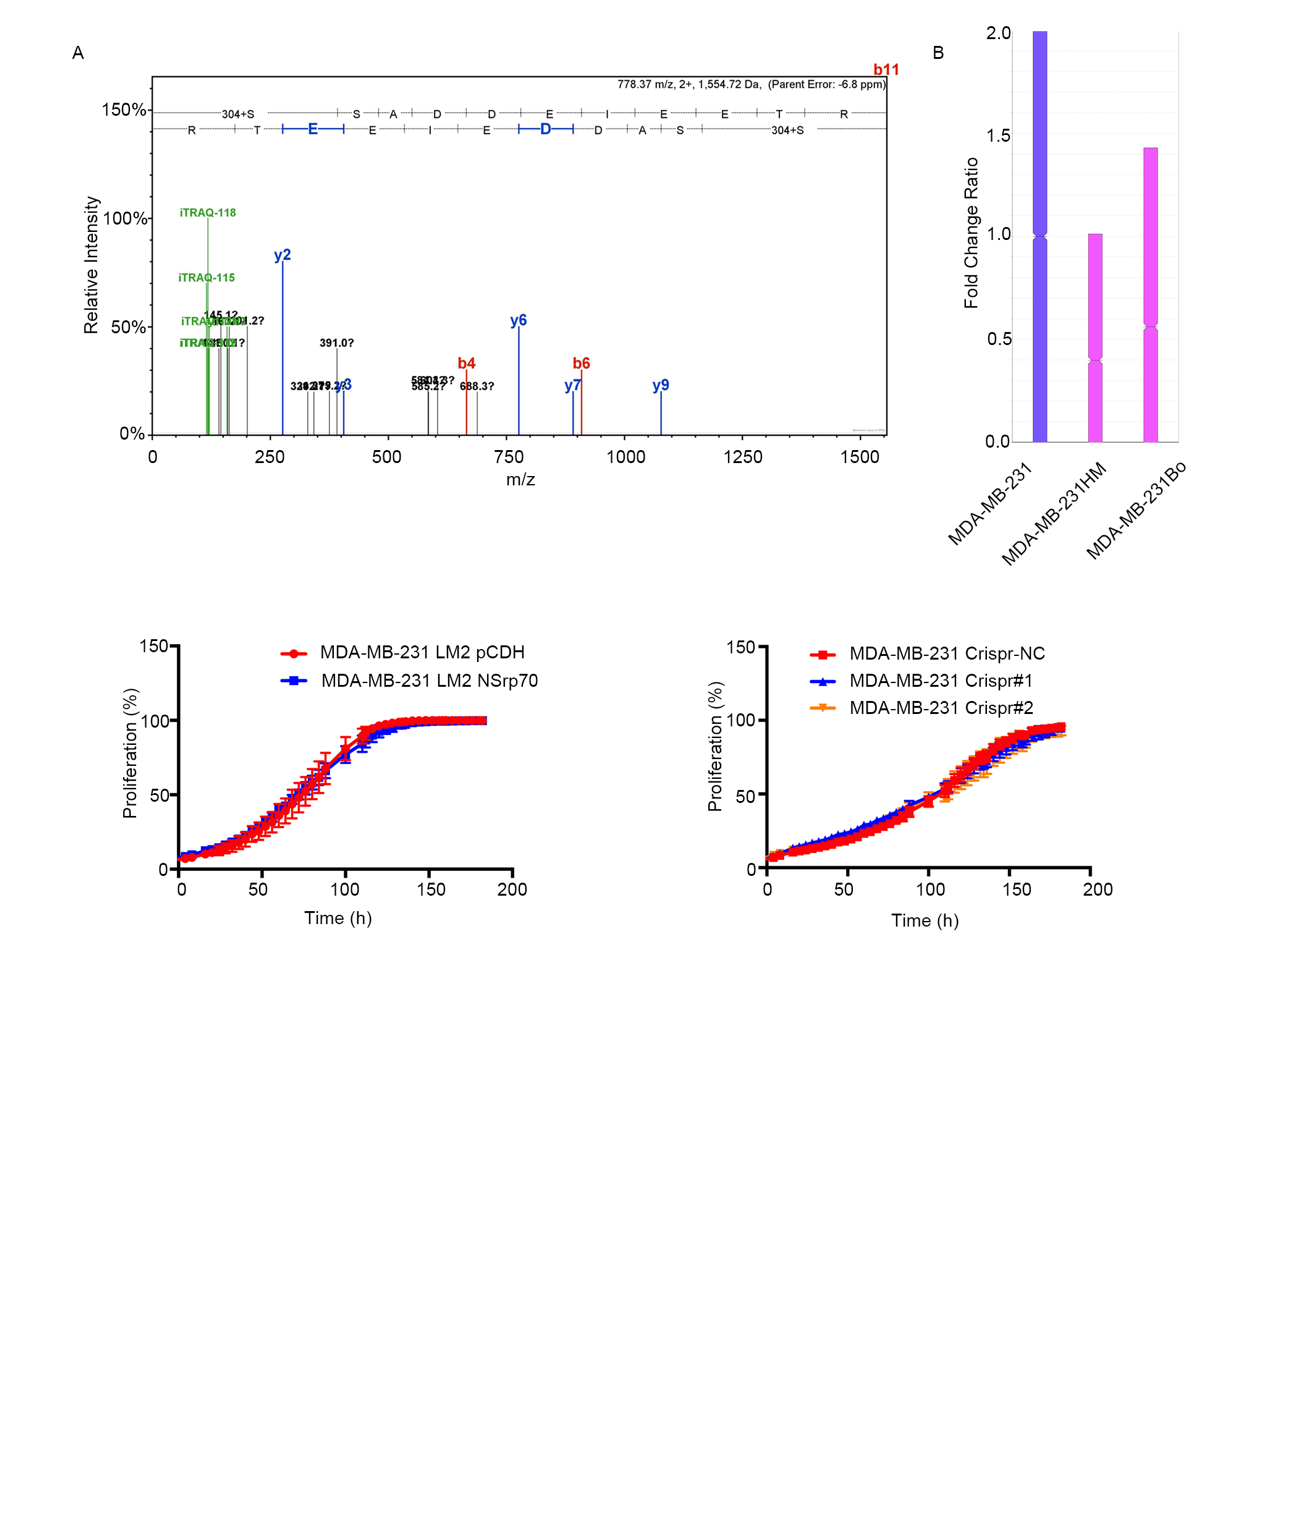
cells.**

A, Peptide spectrum of NSrp70 obtained by mass spectrometry. B, Relative expression of NSrp70 in MDA-MB-231, MDA-MB-231HM and MDA-MB-231Bo cells.

**Supplementary Figure S2 NSrp70 has no effect on breast cancer cell proliferation.**


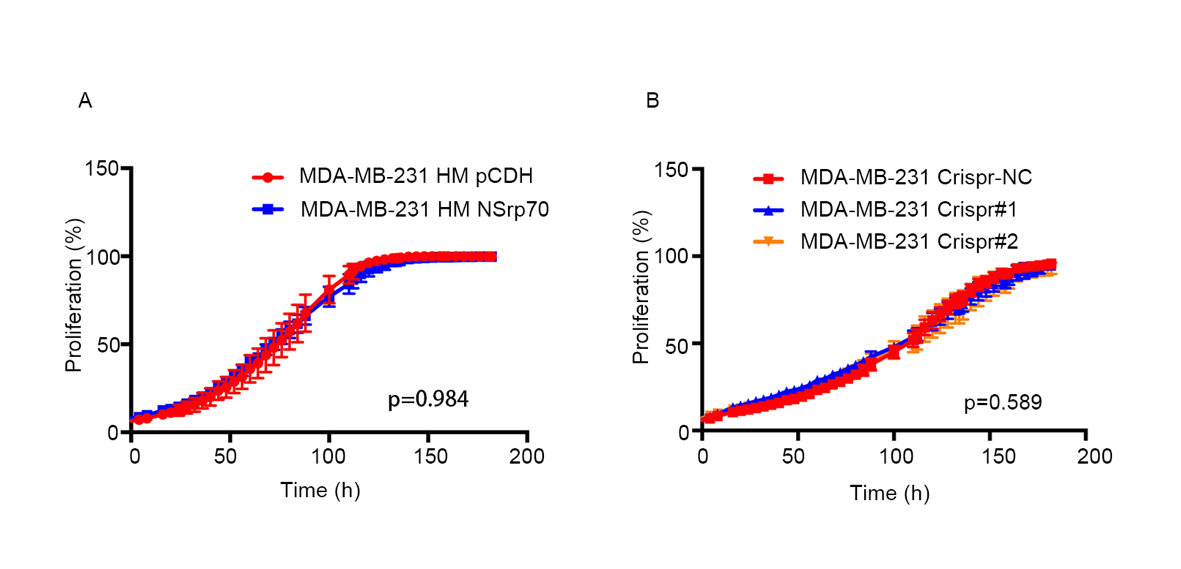


A, Cell proliferation of NSrp70 overexpression in MDA-MB-231HM cell line by incucyte Zoom. B, Cell proliferation of NSrp70 downregulation in MDA-MB-231 cell lines by incucyte Zoom.

**Supplementary Figure S3 The Statistical histogram of five subtypes of alternative splicing in NSrp70 overexpressed cell lines.**


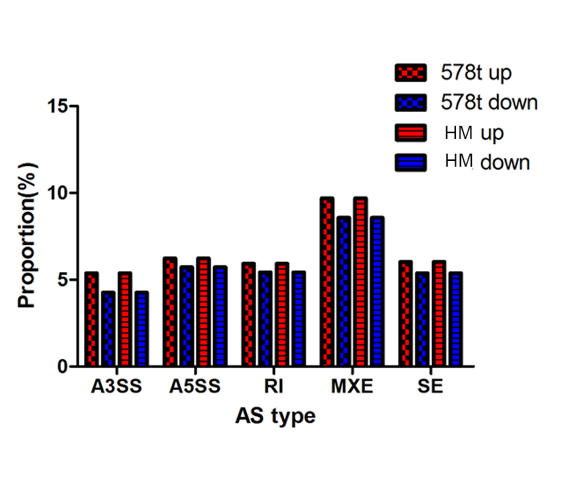


Statistical histogram for the number of five alternative splicing events occurring in NSrp70-overexpressing cell lines Hs-578T and MDA-MB-231HM.

**
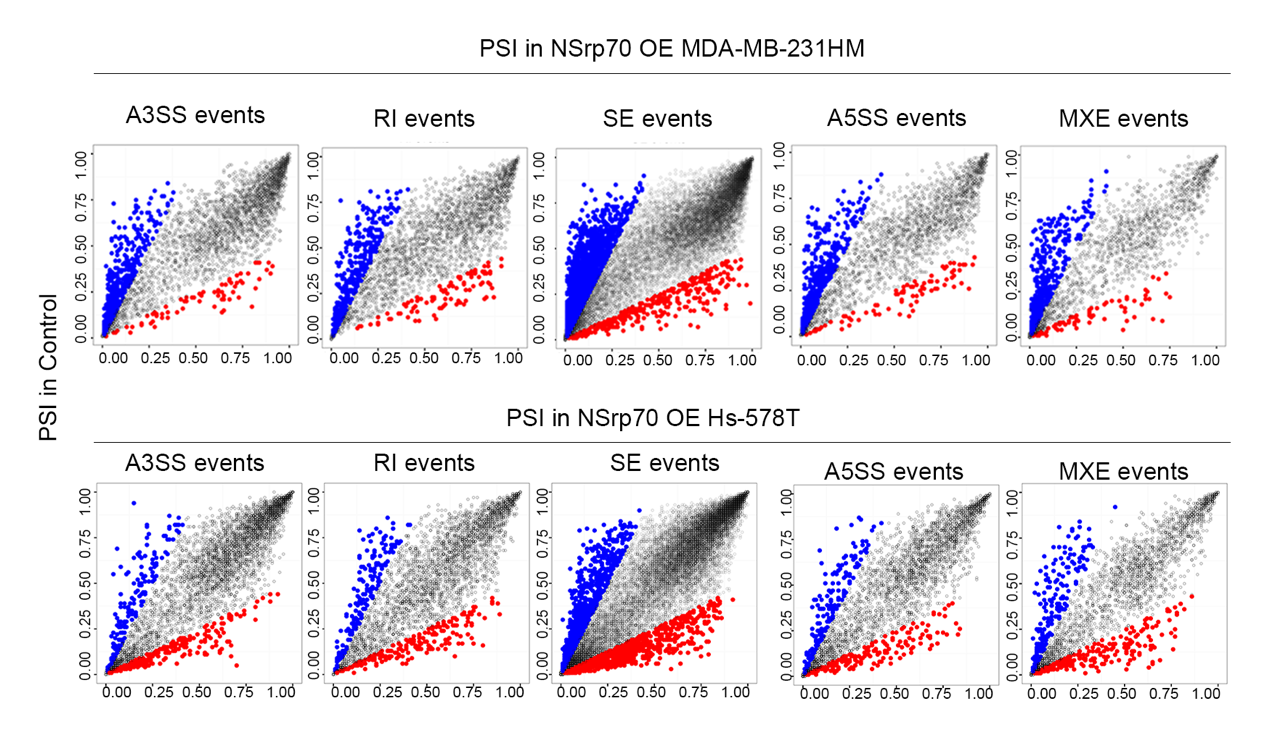
Supplementary Figure S4 The scatter plot of five subtypes of alternative splicing in NSrp70 overexpressed cell lines.**

The scatter plot of five subtypes of alternative splicing in NSrp70 overexpressed MDA-MB-231HM and Hs-578T cell lines. PSI (percent spliced in)

**Supplementary Figure S5 Skipping exon (SE) is the common alternative splicing subtype.**


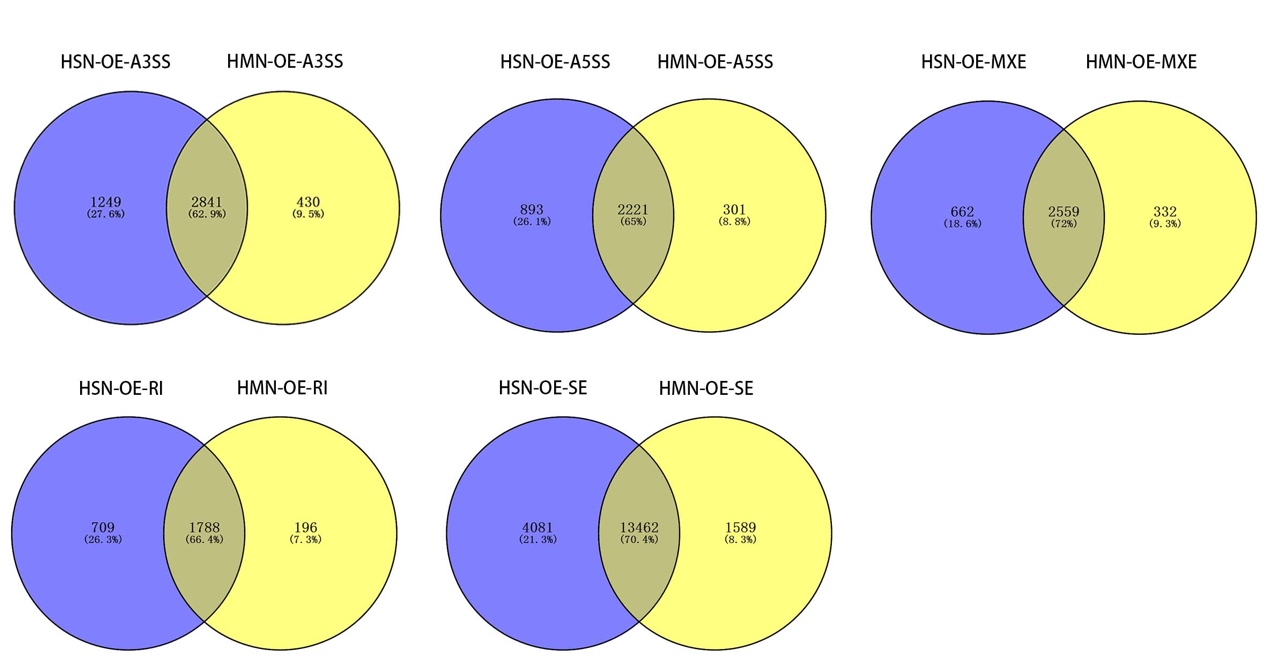


Intersection of splicing events of two NSrp70 overexpressed cell lines MDA-MB-231HM and Hs-578T. Blue: Hs-578T; Yellow: MDA-MB-231HM.

**Supplementary Figure S6 Immunofluorescence detection of EMT-related indicators in NSrp70 depleting cell lines.**


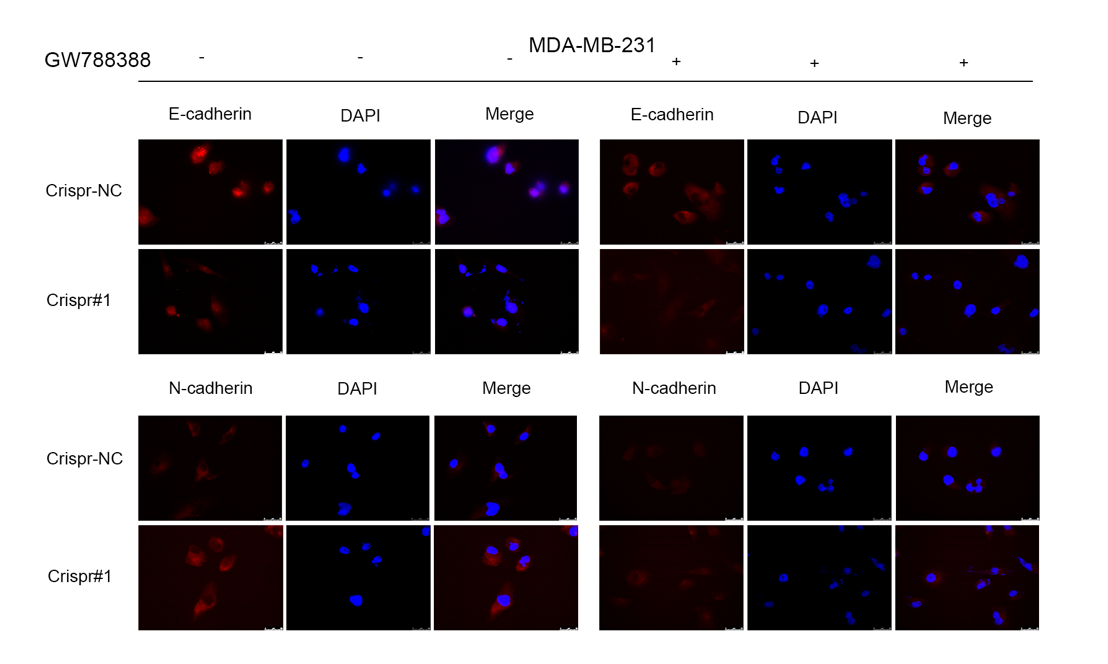


Immunofluorescence detected EMT-related indicators E-cadherin and N-cadherin in MDA-MB-231 cells stably downregulated NSrp70 (magnification, ×600).

**Supplementary Figure S7 mRNA expression level of key molecular of TGF-β signaling.**


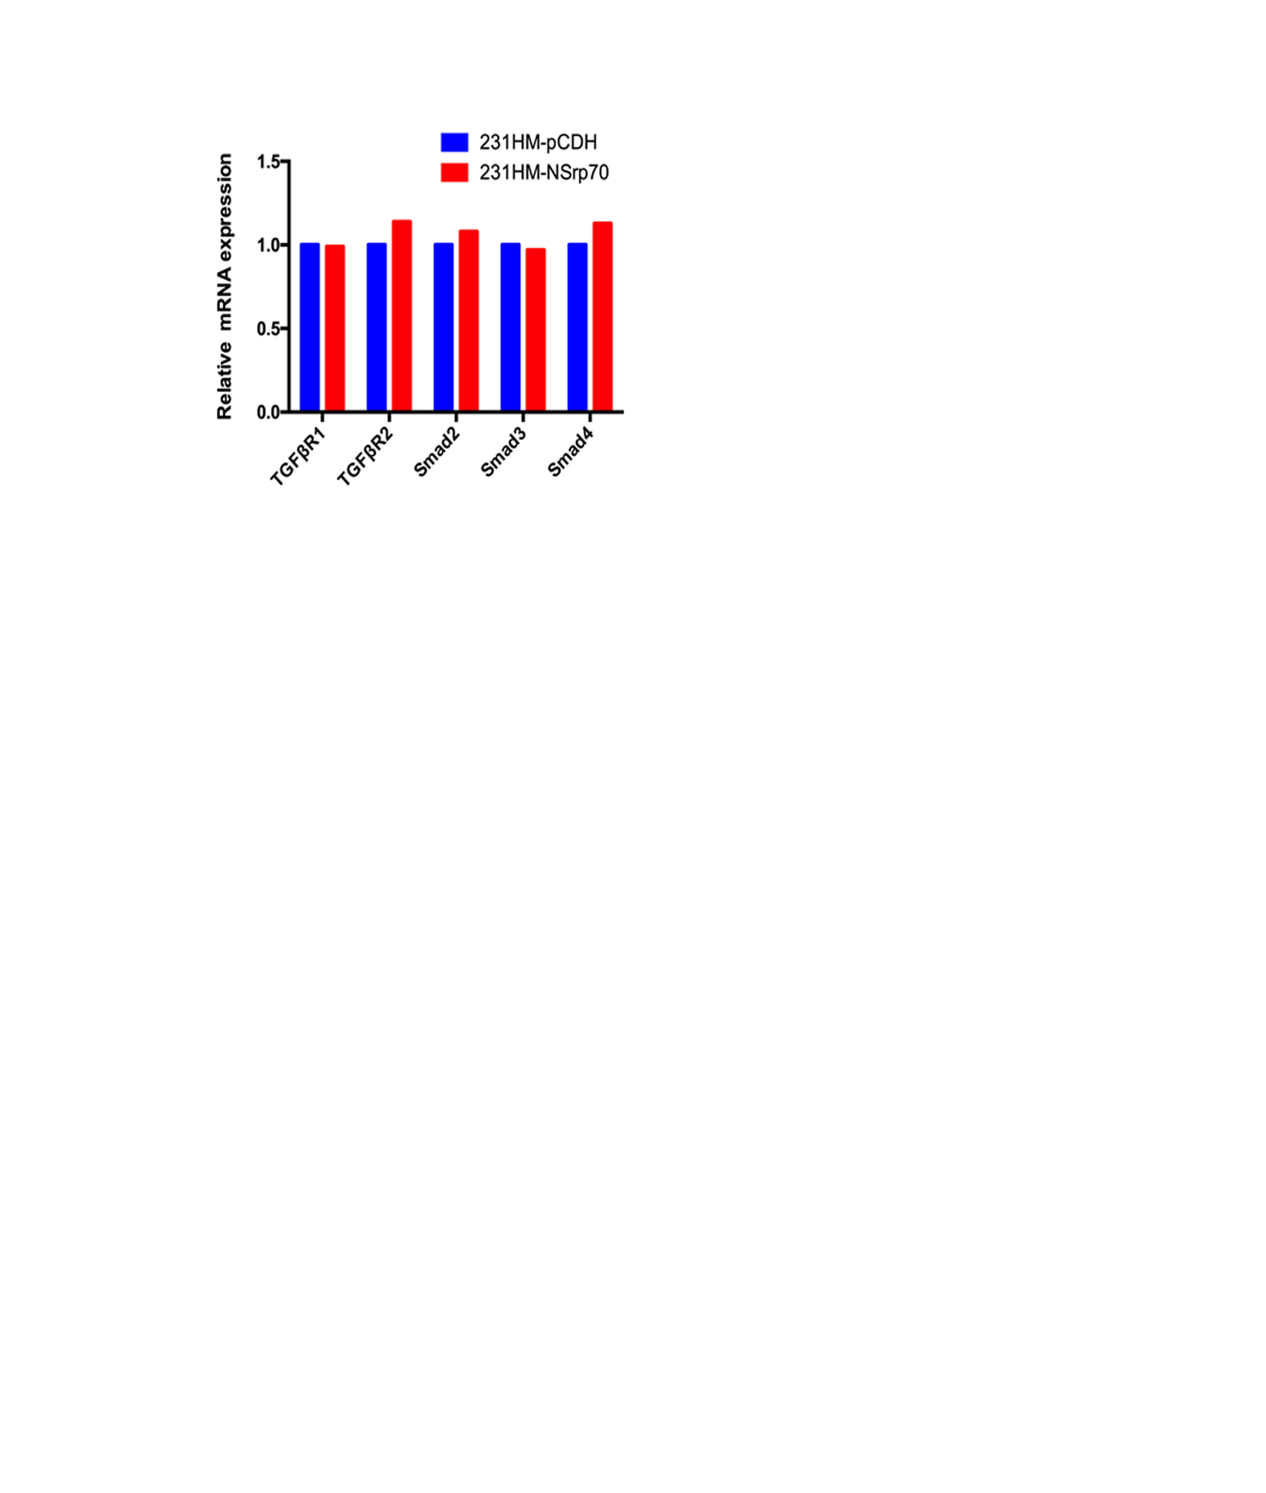


Evaluated the mRNA expression level of TβR1/2 and key molecular of TGF-β signaling in NSrp70 overexpression cell lines.

**Supplementary Figure S8 NSrp70 Inhibits CD44 exon 6-13 SE Splicing.**

**
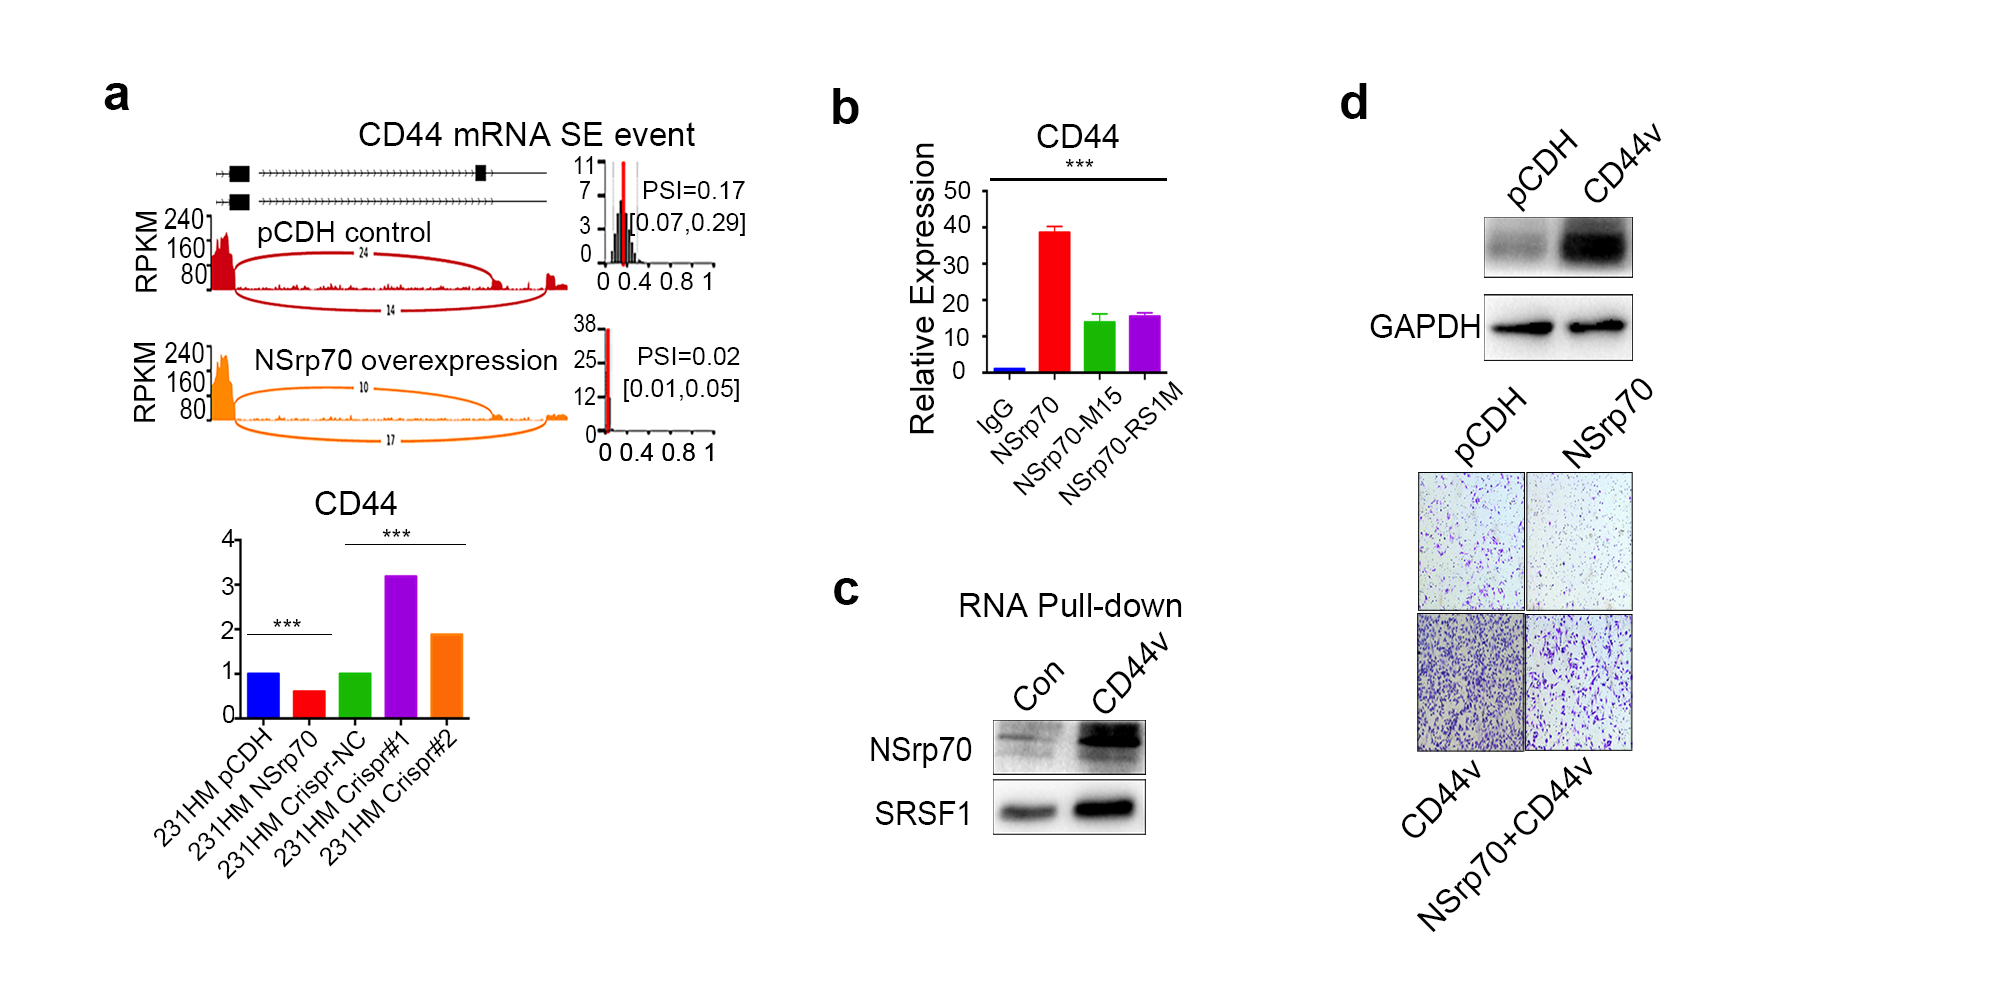
**

a. The superior panels show alternative splicing isoforms and a Sashimi-style plot. The inferior panels show RT-PCR verification of changes in the target gene splicing after NSrp70 overexpression or downregulation. ****p* < 0.001. b. RIP assay evaluation of the binding of NSrp70 or truncation variants (M15 and RS1M) to CD44 mRNAs. c. RNA pull-down from CD44v-overexpressing MDA-MB-231 cell lines. d. Overexpression of CD44v in MDA-MB-231 cells. Transwell assay to detect changes in cell invasion ability of the CD44v-overexpressing cell lines (magnification, ×100).
